# Supplementary material for: The M6A methyltransferase METTL3: acting as a tumor suppressor in renal cell carcinoma
Source: PubMed Central journal article supplement (PMC5707084; doi:10.18632/oncotarget.21726), 2017-10-10
Supplement: oncotarget-08-96103-s001.pdf [file oncotarget-08-96103-s001.pdf]

# The M6A methyltransferase METTL3: acting as a tumor suppressor in renal cell carcinoma

## SUPPLEMENTARY MATERIALS

Supplementary Table 1: 3 selected oligos for sh-METTL3 lentivirus construct

| No      | Start         | Oli Oligo Sequence go Type                                  |
|---------|---------------|-------------------------------------------------------------|
| Sh-M3-1 |               |                                                             |
|         | Top Strand    | 5'- CACCGCTGCACTTCAGACGAATTATCGAAATAATTCGTCTGAAGTGCAGC -3'  |
|         | Bottom Strand | 5'- AAAAGCTGCACTTCAGACGAATTATTCGATAATTCGTCTGAAGTGCAGC -3'   |
|         | ds Oligo      | 5'- CACCGCTGCACTTCAGACGAATTATCGAAATAATTCGTCTGAAGTGCAGC -3'  |
|         |               |                                                             |
|         |               | 3'- CGACGTGAAGTCTGCTTAATAGCTTTATTAAGCAGACTTCACGTGCGAAAA -5' |
| Sh-M3-2 |               |                                                             |
|         | Top Strand    | 5'- CACCGGATACCTGCAAGTATGTTACGAAATGAACATACTTGCAGGTATCC -3'  |
|         | Bottom Strand | 5'- AAAAGGATACCTGCAAGTATGTTATTCGTGAACATACTTGCAGGTATCC -3'   |
|         | ds Oligo      | 5'- CACCGGATACCTGCAAGTATGTTACGAAATGAACATACTTGCAGGTATCC -3'  |
|         |               |                                                             |
|         |               | 3'- CCTATGGACGTTTCATACAAGTGCTTACTTGTATGAACGTCCATAGGAAAA -5' |
| Sh-M3-3 |               |                                                             |
|         | Top Strand    | 5'- CACCGCTCAACATACCCGTAACGAAATGTAGTACGGGTATGTTGAGC -3'     |
|         | Bottom Strand | 5'- AAAAGCTCAACATACCCGTAACATTCGTGTAGTACGGGTATGTTGAGC -3'    |
|         | ds Oligo      | 5'- CACCGCTCAACATACCCGTAACGAAATGTAGTACGGGTATGTTGAGC -3'     |
|         |               |                                                             |
|         |               | 3'- CGAGTTGTATGGGCATGATGTGCTTACATCATGCCATACAACCTCGAAAA -5'  |

Mettl3 : XM\_006720206.1 [http://www.ncbi.nlm.nih.gov/nuccore/XM\\_006720206.1](http://www.ncbi.nlm.nih.gov/nuccore/XM_006720206.1) (The enzyme loci were marked by yellow).

GCTAGCATGAAAGCCAGTGATGCTGATCGACCCTGTCGCAAGCTGCACTTCAGACGAATTATCAATAAACACA CTG.

ATGAGTCTTTAGGTGACTGCTCTTTCCTTAATACATGTTCCACATGGATACCTGCAAGTATGTTCACTA TGAAATTGATGCTTGCATGGATTCTGAGGCCCTGGCAGCAAAGACCACACGCCAAGCCAGGAGCTTGCT CTTACACAGAGTGTGCGGAGGTGATTCCAGTGCAGACCGACTCTTCCCACCTCAGTGGATCTGTTGTGATA TCCGCTACCTGGACGTCAGTATCTTGGGCAAGTTTGCAGTTGTGATGGCTGACCCACCCTGGGATATTCA CATGGAAGTGCCTATGGGACCCTGACAGATGATGAGATGCGCAGGCTCAACATACCCGTAACAGGAT GATGGCTTTCTCTTCTCTGGGTACAGGCAGGGCCATGGAGTTGGGGAGAGAATGTCTAAACCTCTGGG GGTATGAACGGGTAGATGAAATTATTTGGGTGAAGACAAATCAACTGCAACGCATCATTCGGACAGGCCG TACAGGTCAGTGGTTGAACCATGGGAAGGAACACTGCTTGGTTGGTGTCAAAGGAAATCCCAAGGCTTC AACCAGGGTCTGGATTGTGATGTGATCGTAGCTGAGGTTTCGTTCCACCAGTCATAAACCAGATGAAATCT ATGGCATGATTGAAAGACTATCTCCTGGCACTCGCAAGATTGAGTTATTTGGACGACCACACAATGTGCA ACCCAACTGGATCACCTTGGAAACCAACTGGATGGGATCCACCTACTAGACCCAGATGTGGTTGCACGG TTCAAGCAAAGGTACCCAGATGGTATCATCTCTAAACCTAAGAATTTATAGGGCGCGCC.

**Supplementary Table 2: Characteristics of the 145 RCC patients involved in this study**

See Supplementary File 1
